# Supplementary material for: Structure–alkali metal cation complexation relationships for macrocyclic PNP-lariat ether ligandsElectronic supplementary information (ESI) available: diagnostic 31P NMR and 1H NMR spectral data and combustion analyses for new PNP-lariat and bis-lariat ethers. See http://www.rsc.org/suppdata/p2/b1/b110415b/
Source: Royal Society of Chemistry journal article supplement (doi:10.1039/b110415b), 2002-01-30
Supplement: b110415b.pdf [file b110415b.pdf]

## Supplementary Information

---

### Structure-Alkali Metal Cation Complexation Relationships for Macrocyclic PNP-Lariat Ether Ligands

---

Richard A. Bartsch,<sup>\*a</sup> Eun Kyung Lee,<sup>a,b</sup> Sangki Chun<sup>a</sup>, Nazar Elkarim,<sup>a</sup> Krystyna Brandt,<sup>\*c,d</sup>  
Iwona Porwolik-Czomperlik,<sup>c</sup> Mariola Siwy,<sup>c</sup> Dariusz Lach<sup>c</sup>, and Jerzy Silberring<sup>e</sup>

<sup>a</sup>*Department of Chemistry and Biochemistry, Texas Tech University, Lubbock Texas 79409-1061,  
USA*

<sup>b</sup>*Department of Chemistry, Korea University, 1-Anamdong, Seoul 136-701, South Korea*

<sup>c</sup>*Institute of Polymer Chemistry, Polish Academy of Sciences, 41-819 Zabrze, Poland*

<sup>d</sup>*Institute of Chemistry and Environmental Protection, Pedagogical University, 42-201  
Czestochowa, Poland*

<sup>e</sup>*Faculty of Chemistry and Regional Laboratory, Jagiellonian University, 30-060 Krakow, Poland*

---

**Table S1** <sup>31</sup>P NMR spectral data for monoaryloxy-substituted PNP-lariat ethers **3c-f**.

**Table S2** Combustion analysis and <sup>1</sup>H NMR spectral data for monoaryloxy-substituted PNP-lariat Ethers **3c-f**.

**Table S3** <sup>31</sup>P NMR data for tetraaryloxy-substituted PNP-lariat ethers **4c-f**.

**Table S4** Combustion analysis and <sup>1</sup>H NMR spectral data for tetraaryloxy-substituted PNP-lariat ethers **4c-f**.

**Table S5**  $^{31}\text{P}$  NMR spectral data for per-(2-naphthyloxy) *gem*-polymethylenediamino-bridged PNP-bis-lariat ethers **10a-f** and monomeric PNP-lariat ether analogue **7**.

**Table S6** Combustion analysis and  $^1\text{H}$  NMR spectral data for heterogeneously-disubstituted PNP-lariat ether **7** and bis-PNP-lariat ethers **10a-f**.

**Table S1**  $^{31}\text{P}$  NMR spectral data for monoaryloxy-substituted PNP-lariat ethers **3c-f**.

| Compound  | $^{31}\text{P}\{-^1\text{H}\}$ NMR, AMX spin system |              |              |                                    |      |      | $^{31}\text{P}\{=^1\text{H}\}$ NMR |                      |                      |
|-----------|-----------------------------------------------------|--------------|--------------|------------------------------------|------|------|------------------------------------|----------------------|----------------------|
|           | $\delta_{\text{P}_i}$ , ppm <sup>a</sup>            |              |              | $J_{\text{P-P}}$ , Hz <sup>b</sup> |      |      | $J_{\text{P-H}}$ , Hz              |                      |                      |
|           | $\text{P}_A$                                        | $\text{P}_M$ | $\text{P}_X$ | A-M                                | A-X  | M-X  | $\text{P}_A\text{H}$               | $\text{P}_M\text{H}$ | $\text{P}_X\text{H}$ |
| <b>3c</b> | 5.90                                                | 27.60        | 21.10        | 75.0                               | 70.4 | 77.3 | 12.3 <sup>c</sup>                  | <sup>d</sup>         | 25.8 <sup>e</sup>    |
| <b>3d</b> | 6.40                                                | 27.30        | 21.30        | 73.5                               | 68.6 | 80.8 | 12.4 <sup>c</sup>                  | <sup>d</sup>         | 23.5 <sup>e</sup>    |
| <b>3e</b> | 6.46                                                | 27.48        | 20.64        | 75.8                               | 70.7 | 80.6 | 12.5                               |                      | 23.6 <sup>e</sup>    |
| <b>3f</b> | 5.65                                                | 27.32        | 20.86        | 77.7                               | 70.4 | 79.8 | 12.6 <sup>e</sup>                  |                      | 24.5 <sup>e</sup>    |

<sup>a</sup>AMX spin system:  $\text{P}_A = \text{P}(\text{OCH}_2\sim)[\text{OAr}(z)]$ ;  $\text{P}_M = \text{PCl}_2$ ;  $\text{P}_X = \text{P}(\text{OCH}_2\sim)\text{Cl}$ . <sup>b</sup> $J_{\text{P-P}}$  values calculated according to ref. 27. <sup>c</sup>For each peak of the double doublet split into triplets. <sup>d</sup>No proton coupling was evident. <sup>e</sup>For each peak of the double doublet split into quintets.

**Table S2** Combustion analysis and  $^1\text{H}$  NMR spectral data for monoaryloxy-substituted PNP-lariat ethers **3c-f**.

| Formula                                                                                                | Elemental analysis, % <sup>a</sup> |                     |                     | $^1\text{H}$ NMR $\delta_{\text{H}}$ , ppm <sup>b</sup> |                           |                          |                           |                         |                            |                          |                                      |                                      |
|--------------------------------------------------------------------------------------------------------|------------------------------------|---------------------|---------------------|---------------------------------------------------------|---------------------------|--------------------------|---------------------------|-------------------------|----------------------------|--------------------------|--------------------------------------|--------------------------------------|
|                                                                                                        | C                                  | H                   | N                   | (CH <sub>2</sub> )<br>OP                                | (CH <sub>2</sub> )<br>OC  | (CH) <sub>Ar</sub>       | CHO                       | CH <sub>3</sub>         | (CH <sub>2</sub> )<br>OC=O | (CH <sub>2</sub> )<br>C  | (CH <sub>3</sub> ) <sub>2</sub><br>C | (CH <sub>3</sub> ) <sub>x</sub><br>C |
| <b>3c</b> C <sub>17</sub> H <sub>26</sub> O <sub>8</sub> N <sub>3</sub> P <sub>3</sub> Cl <sub>2</sub> | <u>34.35</u><br>34.11              | <u>4.47</u><br>4.35 | <u>6.97</u><br>7.02 | 4.67-<br>4.11<br>(m,4H)                                 | 3.85-<br>3.61<br>(3m,12H) | 8.05-<br>6.75<br>(2m,4H) |                           | 1.40-<br>1.30<br>(t,3H) | 4.36-<br>4.29<br>(qt,2H)   | 1.69-<br>1.66<br>(2s,2H) | 1.31-<br>1.23<br>(2s,6H)             | 0.68<br>(s,9H)                       |
| <b>3d</b> C <sub>22</sub> H <sub>38</sub> O <sub>6</sub> N <sub>3</sub> P <sub>3</sub> Cl <sub>2</sub> | <u>41.30</u><br>41.38              | <u>5.88</u><br>5.96 | <u>6.64</u><br>6.58 | 4.45-<br>4.08<br>(m,4H)                                 | 3.85-<br>3.57<br>(2m,12H) | 7.31-<br>6.71<br>(3m,4H) |                           |                         |                            |                          |                                      |                                      |
| <b>3e</b> C <sub>15</sub> H <sub>21</sub> O <sub>7</sub> N <sub>3</sub> P <sub>3</sub> Cl <sub>2</sub> | <u>32.55</u><br>32.46              | <u>3.83</u><br>3.79 | <u>7.48</u><br>7.57 | 4.58-<br>4.15<br>(2m,2H)                                | 3.91-<br>3.44<br>(m,12H)  | 7.95<br>6.93<br>(4m,4H)  | 10.50-<br>10.40<br>(S,1H) |                         |                            |                          |                                      |                                      |
| <b>3f</b> C <sub>15</sub> H <sub>21</sub> O <sub>7</sub> N <sub>3</sub> P <sub>3</sub> Cl <sub>2</sub> | <u>32.60</u><br>32.46              | <u>3.88</u><br>3.79 | <u>7.49</u><br>7.57 | 4.58-<br>4.09<br>(2m,4H)                                | 4.00-<br>3.53<br>(m,12H)  | 8.09-<br>7.16<br>(2m,4H) | 10.02<br>9.90<br>(2s,1H)  |                         |                            |                          |                                      |                                      |

<sup>a</sup>Calcd./found. <sup>b</sup>In CDCl<sub>3</sub>

**Table S3**  $^{31}\text{P}$  NMR data for tetraaryloxy-substituted PNP-lariat ethers **4c-f**.

| Compound  | $^{31}\text{P}\{-1\text{H}\}$ NMR, $A_2B$ spin system <sup>a</sup> |                         | $J_{\text{P,P}}$ , Hz <sup>b</sup> |
|-----------|--------------------------------------------------------------------|-------------------------|------------------------------------|
|           | $\delta_{\text{p}}$ , ppm                                          |                         |                                    |
|           | $\text{P}_A^{\text{c}}$                                            | $\text{P}_B^{\text{d}}$ |                                    |
| <b>4c</b> | 12.80 (d)                                                          | 8.90 (t)                | 93.5                               |
| <b>4d</b> | 13.70 (d)                                                          | 9.40 (t)                | 89.6                               |
| <b>4e</b> | 13.70 (d)                                                          | 9.67 (t)                | 91.0                               |
| <b>4f</b> | 13.47 (d)                                                          | 9.71 (t)                | 91.2                               |

<sup>a</sup> $A_2B$  spin system:  $\text{P}_A = \text{P}(\text{OCH}_2\sim)[\text{OAr}]$ ;  $\text{P}_B = \text{PCl}_2$ ;  
d - double doublet, corresponds to  $\text{P}_A$  (2 equally substituted  
P atoms), t - triplet, corresponds to  $\text{P}_B$ . <sup>b</sup> $J_{\text{P,P}}$  and  $\delta_{\text{p}}$  values  
calculated according to ref. 28. <sup>c</sup>Proton coupling causes  
collapse into a broad doublet. <sup>d</sup>Proton coupling causes  
weak broadening.

**Table S4** Combustion analysis and <sup>1</sup>H NMR spectral data for tetraaryloxy-substituted PNP-lariat ethers **4c-f**.

| Formula                                                                                 | Elemental analysis, % <sup>a</sup> |                     |                     | <sup>1</sup> H NMR δ <sub>H</sub> , ppm <sup>b</sup> |                           |                           |                           |                          |                            |
|-----------------------------------------------------------------------------------------|------------------------------------|---------------------|---------------------|------------------------------------------------------|---------------------------|---------------------------|---------------------------|--------------------------|----------------------------|
|                                                                                         | C                                  | H                   | N                   | (CH <sub>2</sub> )<br>OP                             | (CH <sub>2</sub> )<br>OC  | (CH) <sub>Ar</sub>        | CHO                       | CH <sub>3</sub>          | (CH <sub>2</sub> )<br>OC=O |
| <b>4c</b> C <sub>44</sub> H <sub>60</sub> O <sub>9</sub> N <sub>3</sub> P <sub>3</sub>  | <u>53.30</u><br>53.44              | <u>5.98</u><br>6.07 | <u>4.33</u><br>4.25 | 4.39-<br>4.05<br>(m,4H)                              | 3.71-<br>3.58<br>(2m,12H) | 7.83-<br>6.81<br>(4m,16H) |                           | 1.39-<br>1.28<br>(t,12H) | 4.37-<br>4.29<br>(qt,8H)   |
| <b>4d</b> C <sub>50</sub> H <sub>104</sub> O <sub>9</sub> N <sub>3</sub> P <sub>3</sub> | <u>52.41</u><br>52.26              | <u>9.20</u><br>9.06 | <u>3.57</u><br>3.66 | 4.90-<br>4.15<br>(m,4H)                              | 3.75-<br>3.61<br>(2m,12H) | 7.94-<br>6.84<br>(2m,16H) |                           | 1.39-<br>1.32<br>(t,12H) | 4.36-<br>4.28<br>(qt,8H)   |
| <b>4e</b> C <sub>36</sub> H <sub>36</sub> O <sub>13</sub> N <sub>3</sub> P <sub>3</sub> | <u>53.09</u><br>53.27              | <u>4.32</u><br>4.44 | <u>5.30</u><br>5.18 | 4.40-<br>4.00<br>(2m,4H)                             | 3.89-<br>3.52<br>(2m,12H) | 8.00-<br>6.94<br>(5m,16H) | 10.40-<br>9.89<br>(3s,4H) |                          |                            |
| <b>4f</b> C <sub>36</sub> H <sub>36</sub> O <sub>13</sub> N <sub>3</sub> P <sub>3</sub> | <u>53.13</u><br>53.27              | <u>4.40</u><br>4.44 | <u>5.24</u><br>5.18 | 4.27-<br>4.07<br>(m,4H)                              | 3.80-<br>3.57<br>(2m,12H) | 8.00-<br>7.03<br>(6M,16H) | 10.04<br>9.83<br>(2s,4H)  |                          |                            |

<sup>a</sup>-Calcd./found. <sup>b</sup>In CDCl<sub>3</sub>

**Table S5**  $^{31}\text{P}$  NMR spectral data for per-(2-naphthyloxy) *gem*-polymethylenediamino-bridged PNP-bis-lariat ethers **10a-f** and monomeric PNP-lariat ether analogue **7**.

| Compound   | n <sup>a</sup> | $^{31}\text{P}\{-^1\text{H}\}$ NMR, AMX spin system |                |                |                                    |      |      | $^{31}\text{P}\{^1\text{H}\}$ NMR |                               |                               |
|------------|----------------|-----------------------------------------------------|----------------|----------------|------------------------------------|------|------|-----------------------------------|-------------------------------|-------------------------------|
|            |                | $\delta_{\text{p}}$ , ppm <sup>b</sup>              |                |                | $J_{\text{p-p}}$ , Hz <sup>c</sup> |      |      | $J_{\text{p-H}}$ , Hz             |                               |                               |
|            |                | P <sub>A</sub>                                      | P <sub>M</sub> | P <sub>X</sub> | A-M                                | A-X  | M-X  | P <sub>A</sub> H <sup>e</sup>     | P <sub>M</sub> H <sup>f</sup> | P <sub>X</sub> H <sup>g</sup> |
| <b>7</b>   | 3              | 16.87                                               | 9.24           | 26.36          | 71.9                               | 66.6 | 58.1 | 8.5                               | 7.2                           |                               |
| <b>10a</b> | 2              | 14.28                                               | 10.75          | 21.38          | 72.6                               | 72.2 | 85.3 | 8.2                               | 7.3                           |                               |
| <b>10b</b> | 3              | 14.45                                               | 10.96          | 21.49          | 71.8                               | 71.8 | 85.2 | 9.4                               | 7.1                           |                               |
| <b>10c</b> | 6              | 14.57                                               | 11.10          | 21.65          | 71.5                               | 71.7 | 85.9 | 8.4                               | 7.4                           |                               |
| <b>10d</b> | 7              | 14.54                                               | 11.06          | 21.60          | 71.5                               | 71.5 | 85.9 | 8.7                               | 7.5                           |                               |
| <b>10e</b> | 10             | 14.64                                               | 11.18          | 21.61          | 71.4                               | 71.4 | 85.9 | 8.9                               | 7.3                           |                               |
| <b>10f</b> | 12             | 14.63                                               | 11.16          | 21.60          | 71.4                               | 71.4 | 85.9 | 8.5                               | 7.3                           |                               |

<sup>a</sup>Number of CH<sub>2</sub> groups in the oligomethylene(di)amino substituent <sup>b</sup> $\delta_{\text{p}}$  and  $J_{\text{p-p}}$  values for the AMX coupling system were calculated according to ref. 27. For **7**: P<sub>A</sub> = P(OCH<sub>2</sub>~)(NHPr); P<sub>M</sub> = P(OCH<sub>2</sub>~)(ONaph) P<sub>X</sub> = P(ONaph)<sub>2</sub>. For **10a-f**: P<sub>A</sub> = P(OCH<sub>2</sub>~)(NHR); P<sub>M</sub> = P(OCH<sub>2</sub>~)(ONaph) P<sub>X</sub> = P(ONaph)<sub>2</sub>. <sup>c</sup>Degenerate double doublet (collapse into a triplet due to overlap of the inner lines). <sup>d</sup>Well-resolved double doublets. <sup>e</sup>Each line splits into 6 signals on proton coupling. <sup>f</sup>Each line splits into a triplet. <sup>g</sup>Lack of noticeable proton coupling.

**Table S6** Combustion analysis and  $^1\text{H}$  NMR spectral data for heterogeneously disubstituted PNP-lariat ether **7** and bis-PNP-lariat ethers **10a-f**.

| Formula                                                                                               | Elemental analysis, % <sup>a</sup> |                     |                     | $^1\text{H}$ NMR $\delta_{\text{H}}$ , ppm <sup>b</sup> |                          |                      |                      |                      |                     |                       |
|-------------------------------------------------------------------------------------------------------|------------------------------------|---------------------|---------------------|---------------------------------------------------------|--------------------------|----------------------|----------------------|----------------------|---------------------|-----------------------|
|                                                                                                       | C                                  | H                   | N                   | (CH <sub>2</sub> )<br>OP                                | (CH <sub>2</sub> )<br>OC | (CH) <sub>Ar</sub>   | NH                   | CH <sub>2</sub> N    | CH <sub>3</sub>     | CH <sub>3</sub>       |
| <b>7</b> C <sub>21</sub> H <sub>31</sub> O <sub>6</sub> N <sub>4</sub> P <sub>3</sub> Cl <sub>2</sub> | <u>42.15</u><br>42.07              | <u>5.28</u><br>5.17 | <u>9.28</u><br>9.35 | 4.60-4.40<br>(m,4H)                                     | 4.40-3.45<br>(3m,12H)    | 7.88-7.45<br>(3m,7H) | 1.87-1.67<br>(2m,1H) | 3.00-2.80<br>(m,2H)  | 0.99-0.77<br>(m,3H) | 1.44-1.19<br>(2m,2H)  |
| <b>10a</b> C <sub>78</sub> H <sub>80</sub> O <sub>16</sub> N <sub>8</sub> P <sub>6</sub>              | <u>59.73</u><br>59.62              | <u>5.18</u><br>5.10 | <u>7.00</u><br>7.13 | 4.60-4.40<br>(m,4H)                                     | 4.40-3.45<br>(3m,12H)    | 7.88-7.45<br>(3m,7H) |                      | 2.50-2.10<br>(m,4H)  |                     |                       |
| <b>10b</b> C <sub>79</sub> H <sub>82</sub> O <sub>16</sub> N <sub>8</sub> P <sub>6</sub>              | <u>59.99</u><br>59.85              | <u>5.27</u><br>5.18 | <u>7.01</u><br>7.07 | 4.34-4.10<br>(2m,8H)                                    | 3.71-3.36<br>(m,24H)     | 7.82-7.12<br>(m,42H) |                      | 2.18<br>(d,4H)       |                     | 0.67<br>(s,2H)        |
| <b>10c</b> C <sub>82</sub> H <sub>88</sub> O <sub>16</sub> N <sub>8</sub> P <sub>6</sub>              | <u>60.47</u><br>60.52              | <u>5.36</u><br>5.41 | <u>6.92</u><br>6.89 | 4.65-4.20<br>(2m,8H)                                    | 3.83-3.39<br>(m,24H)     | 7.89-7.20<br>(m,42H) |                      | 2.45-2.00<br>(m,4H)  |                     | 0.60<br>(m,8H)        |
| <b>10d</b> C <sub>83</sub> H <sub>90</sub> O <sub>16</sub> N <sub>8</sub> P <sub>6</sub>              | <u>60.85</u><br>60.73              | <u>5.61</u><br>5.49 | <u>6.72</u><br>6.83 | 4.20-3.78<br>(2m,8H)                                    | 3.67-3.37<br>(m,24H)     | 7.89-7.20<br>(m,42H) |                      | 2.31-1.96<br>(2m,4H) |                     | 0.83-0.54<br>(2m,10H) |
| <b>10e</b> C <sub>86</sub> H <sub>96</sub> O <sub>16</sub> N <sub>8</sub> P <sub>6</sub>              | <u>61.44</u><br>61.36              | <u>5.83</u><br>5.71 | <u>6.60</u><br>6.66 | 4.75-4.22<br>(2m,8H)                                    | 3.52-3.47<br>(m,24H)     | 7.80-7.23<br>(m,42H) |                      | 2.40-1.83<br>(m,4H)  |                     | 0.93<br>(m,8H)        |
| <b>10f</b> C <sub>88</sub> H <sub>100</sub> O <sub>16</sub> N <sub>8</sub> P <sub>6</sub>             | <u>61.90</u><br>61.75              | <u>5.93</u><br>5.85 | <u>6.49</u><br>6.55 | 4.16-3.81<br>(2m,8H)                                    | 3.65-3.34<br>(m,24H)     | 7.87-7.18<br>(m,42H) |                      | 2.31-2.33<br>(m,4H)  |                     | 0.76-1.26<br>(m,10H)  |

<sup>a</sup>Calcd./found. <sup>b</sup>In CDCl<sub>3</sub>.
